# Supplementary material for: A Multi-Gene Signature of Non-Muscle-Invasive Bladder Cancer Identifies Patients Who Respond to Immunotherapies Including Bacillus Calmette–Guérin and Immune Checkpoint Inhibitors
Source: MDPI journal article supplement (doi:10.3390/ijms25073800), 2024-03-28
Supplement: s1 [file s1]

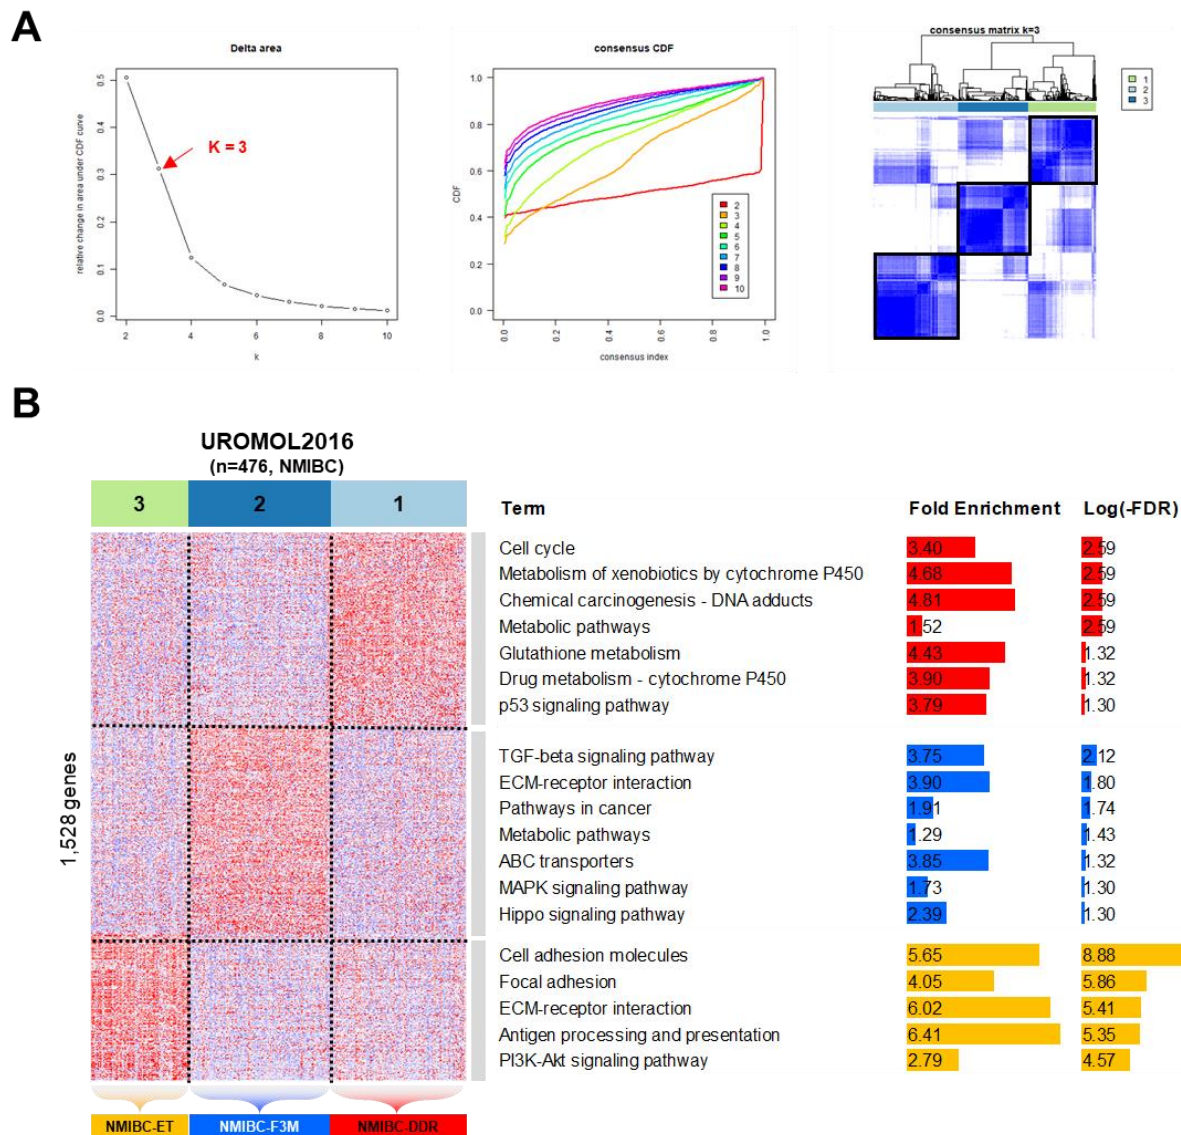

**Supplementary Figure S1.** Identification of the number of clusters through consensus clustering analysis and characterization of subtype through enriched biological pathway. (A) Cluster stability estimated according to relative changes in the area under the consensus distribution function curve across  $k = 2-10$ , revealed that 3 clusters were distinguishable in the NMIBC. Consensus matrix heatmap for  $k = 3$ . Data are presented in matrix format, in which white and blue denote no correlation (0) or a perfect correlation (1). (B) Gene expression patterns and enriched biological characteristics at five clusters. The color in the heatmap reflect relatively high (red) and low (blue) expression. Functional analyzes by DAVID representing defined clusters were indicated by colors and selected by statistical significance ( $FDR < 0.25$ ).

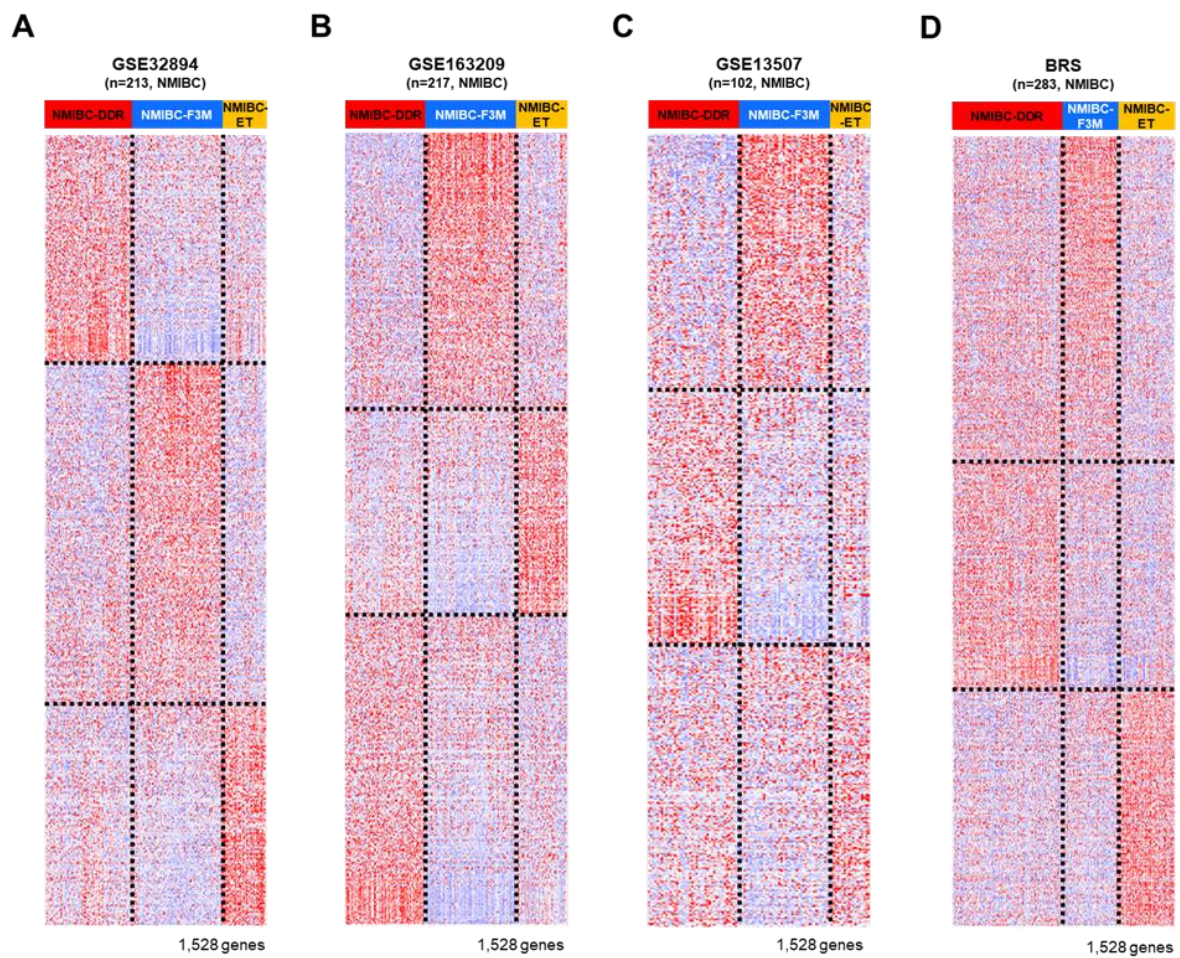

**Supplementary Figure S2.** Estimation of prognostic relevance in validation cohorts (NMIBC) based on the prediction models. (A, B, C, and D) Gene expression patterns of validation cohorts. The color in the heatmap reflect relatively high (red) and low (blue) expression.



**A**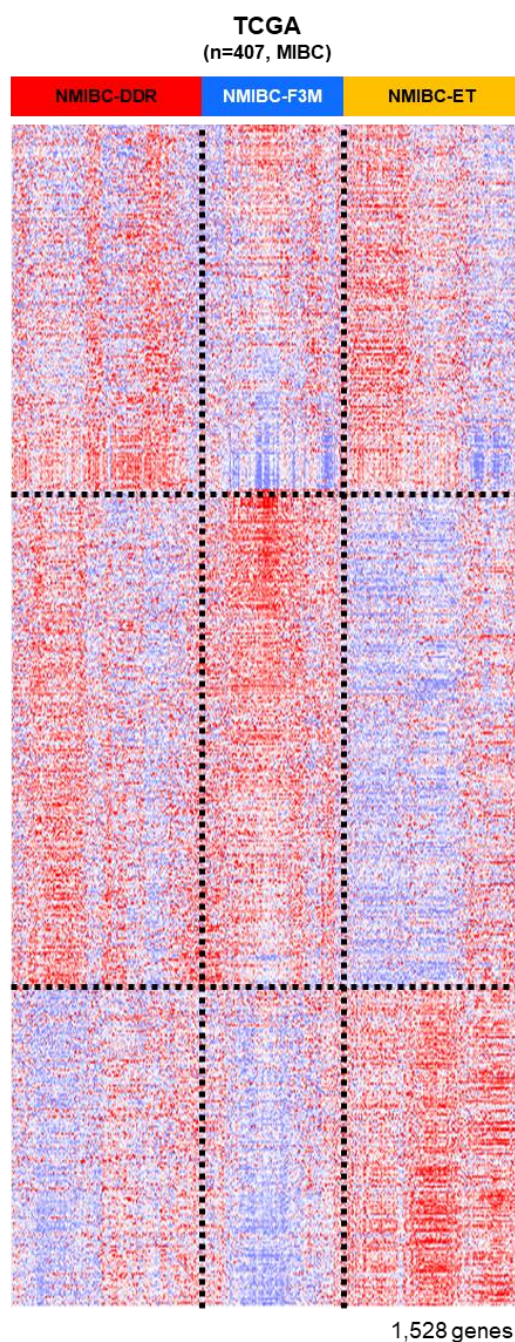**B**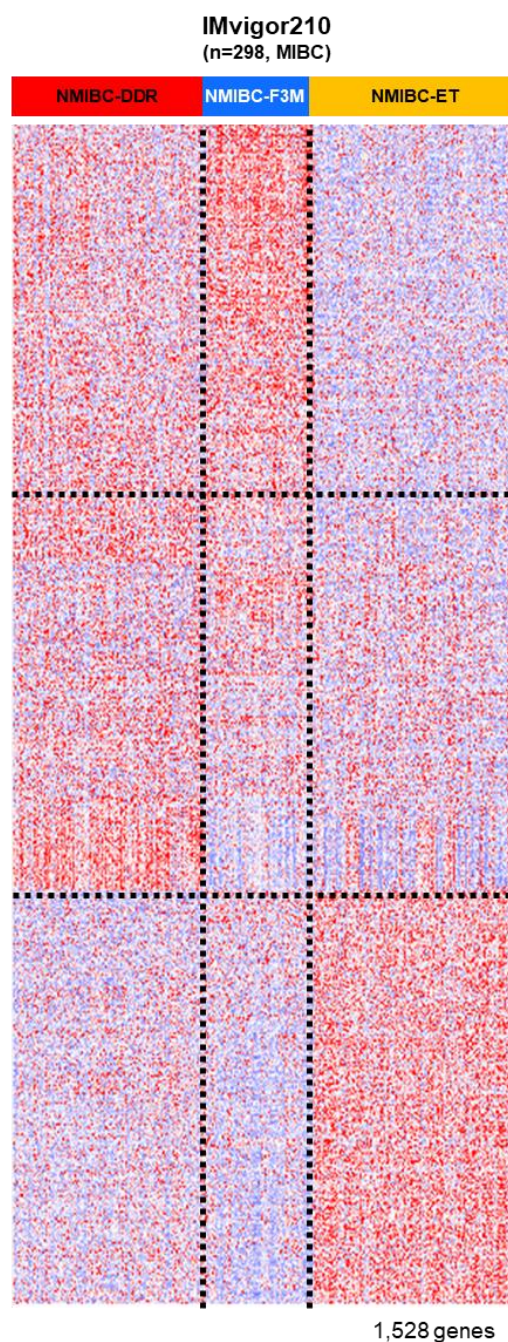

**Supplementary Figure S3.** Estimation of prognostic relevance in MIBC patients based on the prediction models. (A) Gene expression patterns of TCGA. The color in the heatmap reflect relatively high (red) and low (blue) expression. (B) Gene expression patterns of IMvigor210 trial with immunotherapy treatment. The color in the heatmap reflect relatively high (red) and low (blue) expression.

**Supplementary Table S1.** Results of grid search for hyperparameter modification

| Rank                                                                                                                      | m <sub>try</sub> | Node size | Sample size | OOB RMSE |
|---------------------------------------------------------------------------------------------------------------------------|------------------|-----------|-------------|----------|
| 1                                                                                                                         | 30               | 2         | 0.8         | 0.268982 |
| 2                                                                                                                         | 30               | 4         | 0.8         | 0.268982 |
| 3                                                                                                                         | 10               | 6         | 0.8         | 0.273743 |
| 4                                                                                                                         | 190              | 2         | 0.8         | 0.278423 |
| 5                                                                                                                         | 30               | 6         | 0.8         | 0.278423 |
| 6                                                                                                                         | 190              | 4         | 0.8         | 0.283025 |
| 7                                                                                                                         | 140              | 6         | 0.8         | 0.283025 |
| 8                                                                                                                         | 290              | 6         | 0.8         | 0.283025 |
| 9                                                                                                                         | 30               | 8         | 0.8         | 0.283025 |
| 10                                                                                                                        | 140              | 8         | 0.8         | 0.283025 |
| 11                                                                                                                        | 10               | 12        | 0.8         | 0.283025 |
| 12                                                                                                                        | 30               | 12        | 0.8         | 0.283025 |
| 13                                                                                                                        | 60               | 12        | 0.8         | 0.283025 |
| 14                                                                                                                        | 10               | 14        | 0.8         | 0.283025 |
| 15                                                                                                                        | 140              | 14        | 0.8         | 0.283025 |
| 16                                                                                                                        | 60               | 16        | 0.8         | 0.283025 |
| 17                                                                                                                        | 110              | 4         | 0.8         | 0.287554 |
| 18                                                                                                                        | 70               | 8         | 0.8         | 0.287554 |
| 19                                                                                                                        | 10               | 10        | 0.8         | 0.287554 |
| 20                                                                                                                        | 70               | 10        | 0.8         | 0.287554 |
| Mtry, the number of variables to randomly sample as candidates at each split; OOB RMSE, Out of bag root-mean-square error |                  |           |             |          |

**Supplementary Table S2.** Result of retraining of prediction model by applying hyperparameters for improved performance

|            |           |           |           |          |                                    |                  |
|------------|-----------|-----------|-----------|----------|------------------------------------|------------------|
| Prediction |           | NMIBC-DDR | NMIBC-F3M | NMIBC-ET | Overall statistics (Training data) |                  |
|            | NMIBC-DDR | 145       | 0         | 0        | Accuracy                           | 1                |
|            | NMIBC-F3M | 0         | 140       | 0        | Kappa                              | 1                |
|            | NMIBC-ET  | 0         | 0         | 102      | 95% CI                             | (0.9905, 1)      |
|            |           |           |           |          | P-value [ACC > NIR]                | < 2.2E-16        |
|            |           |           |           |          | Mcnemar's Test P-value             | na               |
| Prediction |           | NMIBC-DDR | NMIBC-F3M | NMIBC-ET | Overall statistics (Test data)     |                  |
|            | NMIBC-DDR | 29        | 2         | 0        | Accuracy                           | 0.9438           |
|            | NMIBC-F3M | 2         | 32        | 1        | Kappa                              | 0.9147           |
|            | NMIBC-ET  | 0         | 0         | 23       | 95% CI                             | (0.8737, 0.9815) |
|            |           |           |           |          | P-value [ACC > NIR]                | < 2.2E-16        |
|            |           |           |           |          | Mcnemar's Test P-value             | na               |

**Supplementary Table S3.** Univariate and multivariate Cox proportional hazards regression analysis in the independent cohorts.

|                                                | Variable                           | Univariate  |         |         |         | Multivariate |         |         |         |
|------------------------------------------------|------------------------------------|-------------|---------|---------|---------|--------------|---------|---------|---------|
|                                                |                                    | hazardRatio | ciLower | ciUpper | p-value | hazardRatio  | ciLower | ciUpper | p-value |
| Disease progression<br>in the GSE163209 cohort | Gender                             |             |         |         |         |              |         |         |         |
|                                                | Male (Ref.) vs. Female             | 0.54        | 0.18    | 1.66    | 0.289   |              |         |         |         |
|                                                | Age                                |             |         |         |         |              |         |         |         |
|                                                | ≤ 69 (Ref.) vs. > 69               | 2.81        | 1.01    | 7.78    | 0.04    |              |         |         |         |
|                                                | Stage                              |             |         |         |         |              |         |         |         |
|                                                | Ta (Ref.) vs. T1                   | 19.7        | 2.64    | 148.03  | 0.003   | 5.68         | 0.75    | 42.93   | 0.09    |
|                                                | Grade                              |             |         |         |         |              |         |         |         |
|                                                | Low (Ref.) vs. High                | 3.64E+08    | 0       | inf     | 0.99    |              |         |         |         |
|                                                | The multi-gene signature           |             |         |         |         |              |         |         |         |
|                                                | Other classes (Ref.) vs. NMIBC-DDR | 3.36        | 1.34    | 8.45    | 0.009   | 1.66         | 0.62    | 4.39    | 0.306   |
|                                                | Variable                           | Univariate  |         |         |         | Multivariate |         |         |         |
|                                                |                                    | hazardRatio | ciLower | ciUpper | p-value | hazardRatio  | ciLower | ciUpper | p-value |
| Disease progression<br>in the GSE32894 cohort  | Gender                             |             |         |         |         |              |         |         |         |
|                                                | Male (Ref.) vs. Female             | 0.56        | 0.16    | 1.95    | 0.364   |              |         |         |         |
|                                                | Age                                |             |         |         |         |              |         |         |         |
|                                                | ≤ 69 (Ref.) vs. > 69               | 2.42        | 0.86    | 6.84    | 0.095   |              |         |         |         |
|                                                | Stage                              |             |         |         |         |              |         |         |         |
|                                                | Ta (Ref.) vs. T1                   | 5.13        | 1.69    | 15.6    | 0.003   | 3.45         | 1.03    | 11.47   | 0.043   |
|                                                | Grade                              |             |         |         |         |              |         |         |         |
|                                                | Low (Ref.) vs. High                | 5.12        | 1.92    | 13.68   | < 0.001 |              |         |         |         |
|                                                | The multi-gene signature           |             |         |         |         |              |         |         |         |
|                                                | Other classes (Ref.) vs. NMIBC-DDR | 4.23        | 1.51    | 11.89   | 0.006   | 2.55         | 0.83    | 7.76    | 0.099   |
|                                                | Variable                           | Univariate  |         |         |         | Multivariate |         |         |         |
|                                                |                                    | hazardRatio | ciLower | ciUpper | p-value | hazardRatio  | ciLower | ciUpper | p-value |
| Disease progression<br>in the GSE13507 cohort  | Gender                             |             |         |         |         |              |         |         |         |
|                                                | Male (Ref.) vs. Female             | 0           | 0       | inf     | 0.997   |              |         |         |         |
|                                                | Age                                |             |         |         |         |              |         |         |         |
|                                                | ≤ 69 (Ref.) vs. > 69               | 2.82        | 0.81    | 9.89    | 0.104   |              |         |         |         |
|                                                | Stage                              |             |         |         |         |              |         |         |         |
|                                                | Ta (Ref.) vs. T1                   | 1.11        | 0.29    | 4.25    | 0.877   | 0.62         | 0.13    | 2.81    | 0.541   |
|                                                | Grade                              |             |         |         |         |              |         |         |         |
|                                                | Low (Ref.) vs. High                | 3.00        | 0.77    | 11.68   | 0.112   |              |         |         |         |
|                                                | The multi-gene signature           |             |         |         |         |              |         |         |         |

|                                        |                                    |             |            |         |         |             |              |         |         |
|----------------------------------------|------------------------------------|-------------|------------|---------|---------|-------------|--------------|---------|---------|
| Other classes (Ref.) vs. NMIBC-DDR     |                                    | 9.64        | 1.99       | 46.77   | 0.004   | 8.64        | 1.56         | 47.79   | 0.013   |
| Overall survival in the<br>TCGA cohort | Variable                           | hazardRatio | Univariate |         | p-value | hazardRatio | Multivariate |         | p-value |
|                                        |                                    |             | ciLower    | ciUpper |         |             | ciLower      | ciUpper |         |
|                                        | Gender                             |             |            |         |         |             |              |         |         |
|                                        | Male (Ref.) vs. Female             | 1.11        | 0.80       | 1.54    | 0.518   |             |              |         |         |
|                                        | Age                                |             |            |         |         |             |              |         |         |
|                                        | ≤ 69 (Ref.) vs. > 69               | 1.55        | 1.15       | 2.08    | 0.003   | 1.57        | 1.16         | 2.11    | 0.002   |
|                                        | Stage                              |             |            |         |         |             |              |         |         |
|                                        | Ta (Ref.) vs. T1                   | 9205052     | 0          | inf     | 0.992   |             |              |         |         |
|                                        | Grade                              |             |            |         |         |             |              |         |         |
|                                        | Low (Ref.) vs. High                | 2.90        | 0.71       | 11.73   | 0.135   |             |              |         |         |
|                                        | The multi-gene signature           |             |            |         |         |             |              |         |         |
|                                        | Other classes (Ref.) vs. NMIBC-DDR | 1.41        | 1.05       | 1.89    | 0.021   | 1.43        | 1.07         | 1.93    | 0.015   |
